# Supplementary material for: The Scope of Antibiotic Resistance Genes in Sewages of Rostov-on-Don and lower Don River
Source: Preprints.org preprint supplement (doi:10.20944/preprints201811.0451.v1), 2018-11-19
Supplement: Supplementary file 3 [file supplementary]

## The scope of antibiotic resistance genes in sewages of Rostov-on-Don and lower Don River

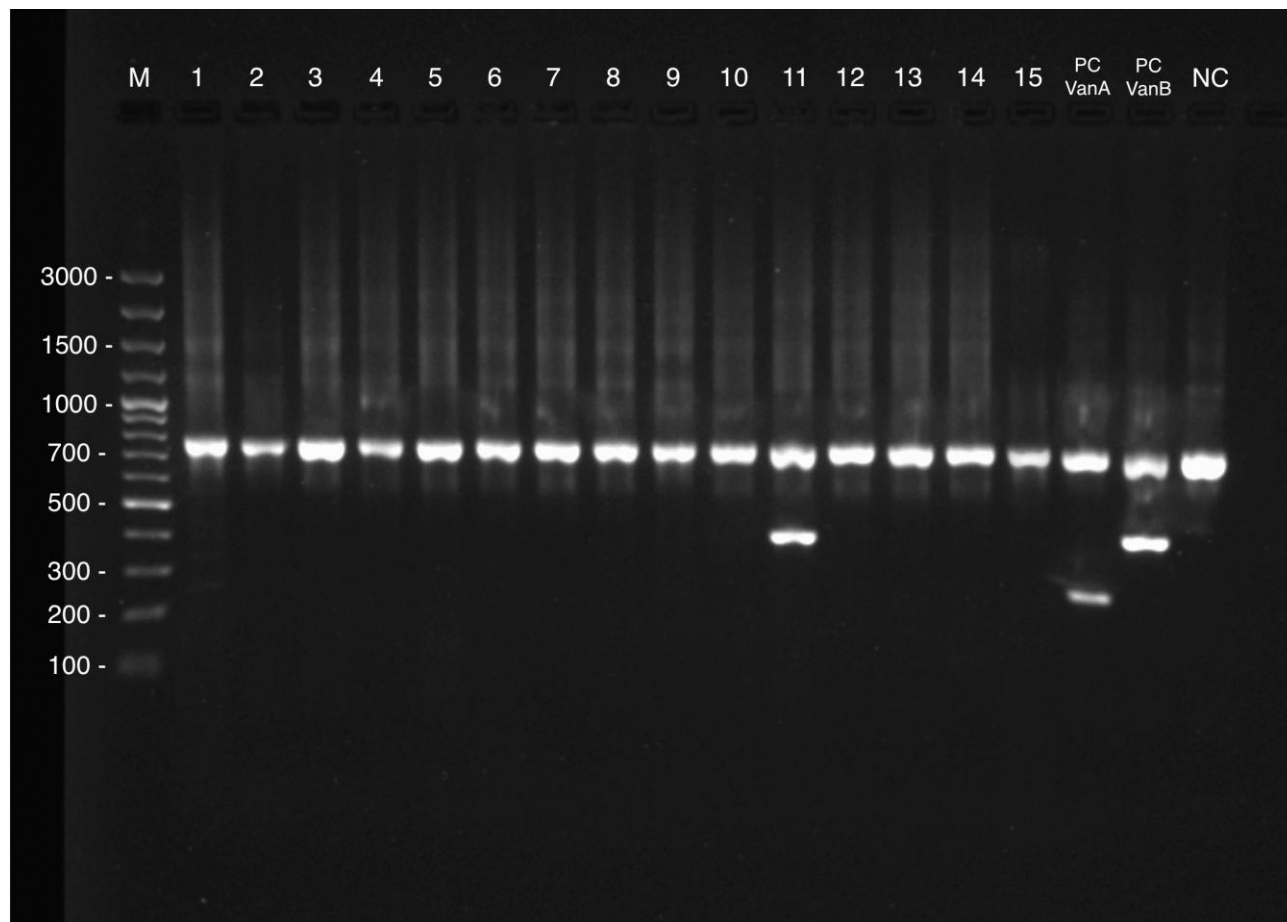

**Figure S4.** Agarose gel electrophoresis of PCR-amplified VanA and VanB genes in surface sediment samples.

Lanes: M – mol. weight marker; 1 – sample 20; 2 – sample 19; 3 – sample 18; 4 – sample 17; 5 – sample 16; 6 – sample 15; 7 – sample 13; 8 – sample 12; 9 – sample 11; 10 – sample 10; 11 – sample 9; 12 – sample 2; 13 – sample 1; 14 – sample 7; 15 – sample 8; PC VanA – VanA positive control (256 b.p.); PC VanB – VanB positive control (427 b.p.); NC – negative control.
