# Supplementary material for: The Scope of Antibiotic Resistance Genes in Sewages of Rostov-on-Don and lower Don River
Source: Preprints.org preprint supplement (doi:10.20944/preprints201811.0451.v1), 2018-11-19
Supplement: Supplementary file 6 [file supplementary]

## The scope of antibiotic resistance genes in sewages of Rostov-on-Don and lower Don River

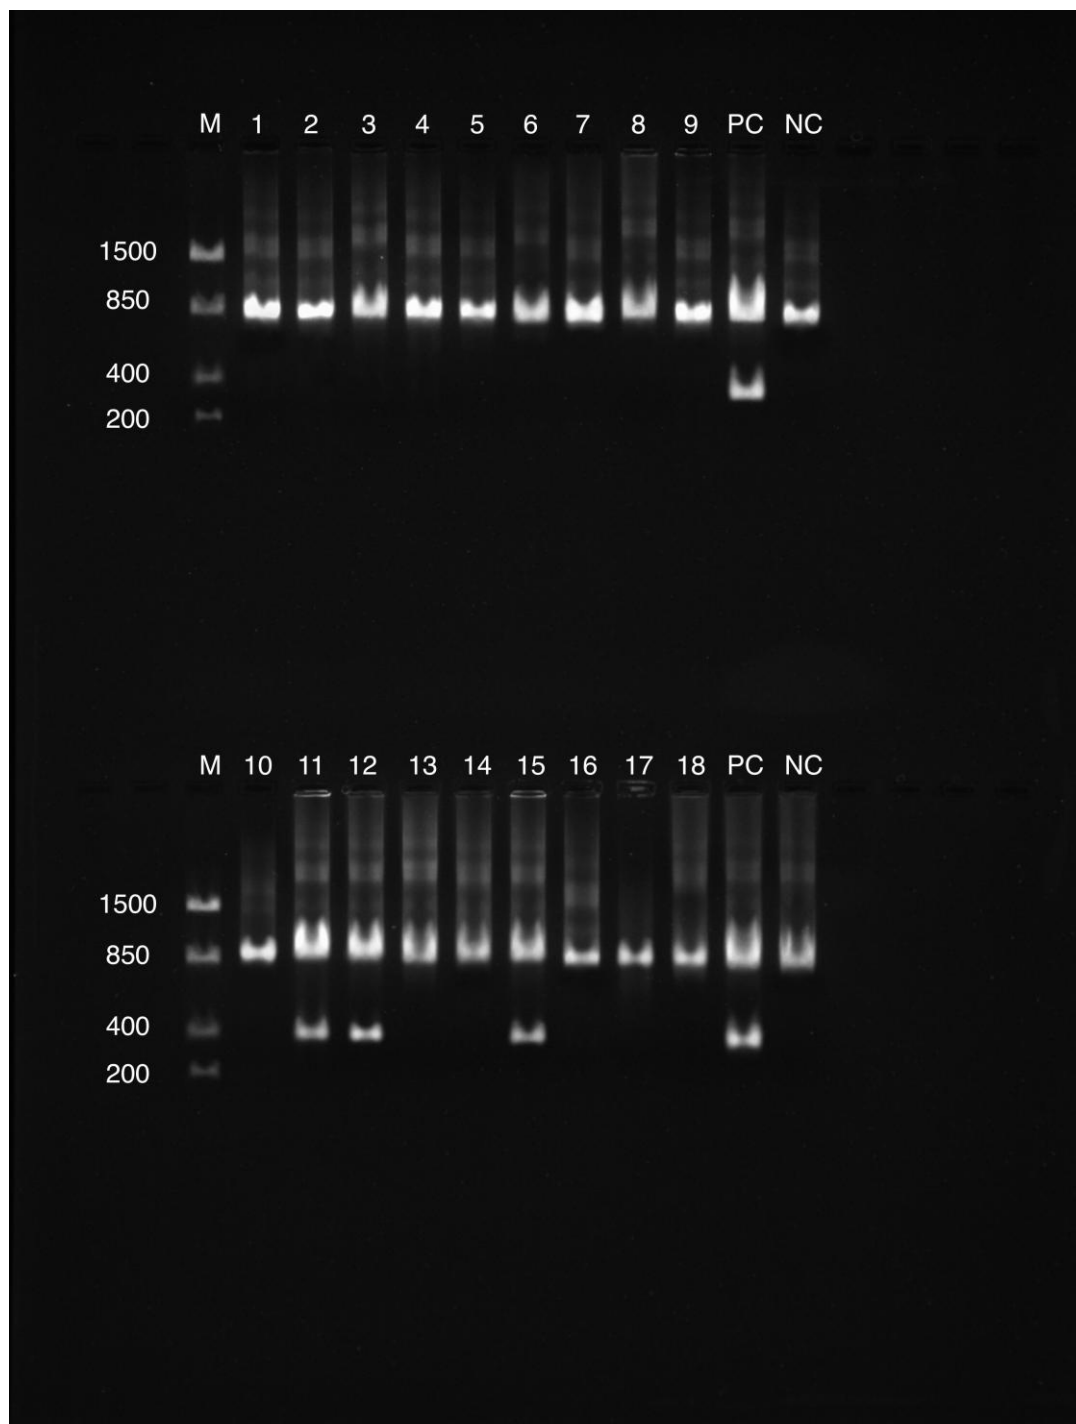

**Figure S7.** Agarose gel electrophoresis of PCR-amplified NDM genes in wastewater samples. Lanes: M – mol. weight marker; 1 – sample 31; 2 – sample 32; 3 – sample 33; 4 – sample 34; 5 – sample 35; 6 – sample 36; 7 – sample 37; 8 – sample 38; 9 – sample 39; 10 – sample 40; 11 – sample 41; 12 – sample 42; 13 – sample 43; 14 – sample 44; 15 – sample 45; 16 – sample 46; 17 – sample 47; 18 – sample 48; PC – NDM positive control (303 b.p.); NC – negative control.
