# Supplementary material for: The Scope of Antibiotic Resistance Genes in Sewages of Rostov-on-Don and lower Don River
Source: Preprints.org preprint supplement (doi:10.20944/preprints201811.0451.v1), 2018-11-19
Supplement: Supplementary file 9 [file supplementary]

## The scope of antibiotic resistance genes in sewages of Rostov-on-Don and lower Don River

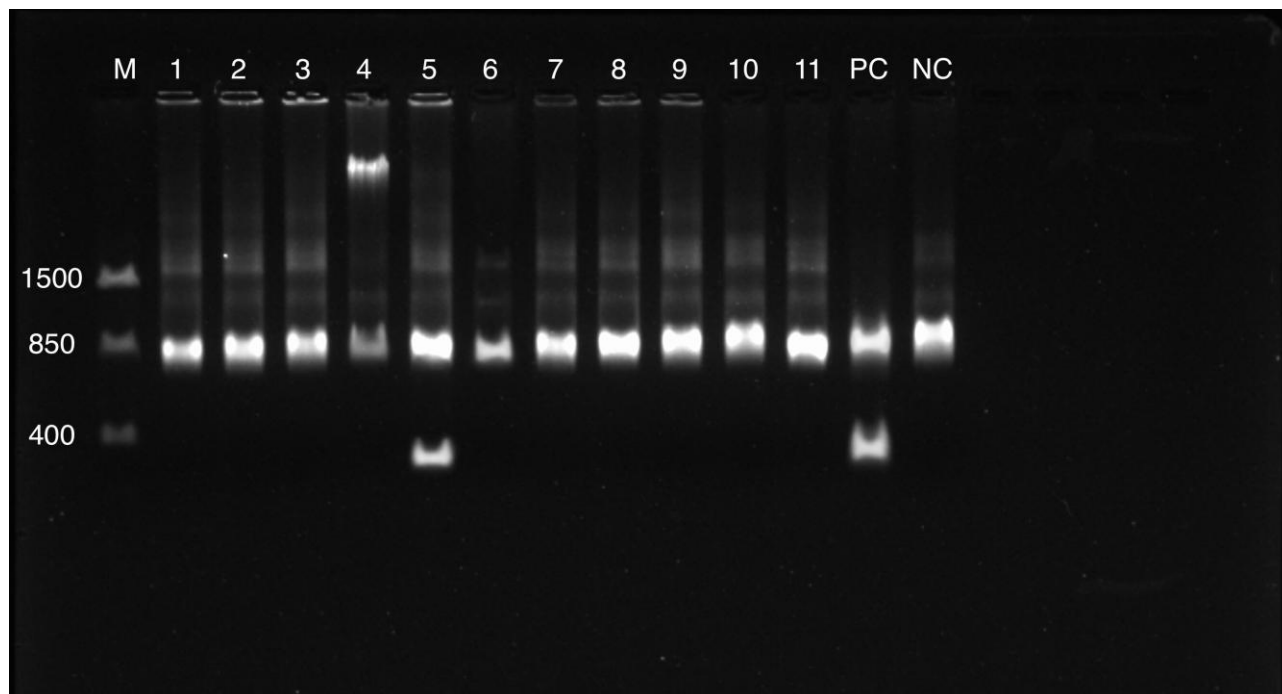

**Figure S1.** Agarose gel electrophoresis of PCR-amplified OXA-48 genes in samples of natural waters.

Lanes: M – mol. weight marker; 1 – sample 28; 2 – sample 21; 3 – sample 29; 4 – sample 22; 5 – sample 14; 6 – sample 23; 7 – sample 24; 8 – sample 25; 9 – sample 30; 10 – sample 26; 11 – sample 27; PC – OXA-48 positive control (315 b.p.); NC – negative control.
