# Supplementary material for: The Scope of Antibiotic Resistance Genes in Sewages of Rostov-on-Don and lower Don River
Source: Preprints.org preprint supplement (doi:10.20944/preprints201811.0451.v1), 2018-11-19
Supplement: Supplementary file 10 [file supplementary]

## The scope of antibiotic resistance genes in sewages of Rostov-on-Don and lower Don River

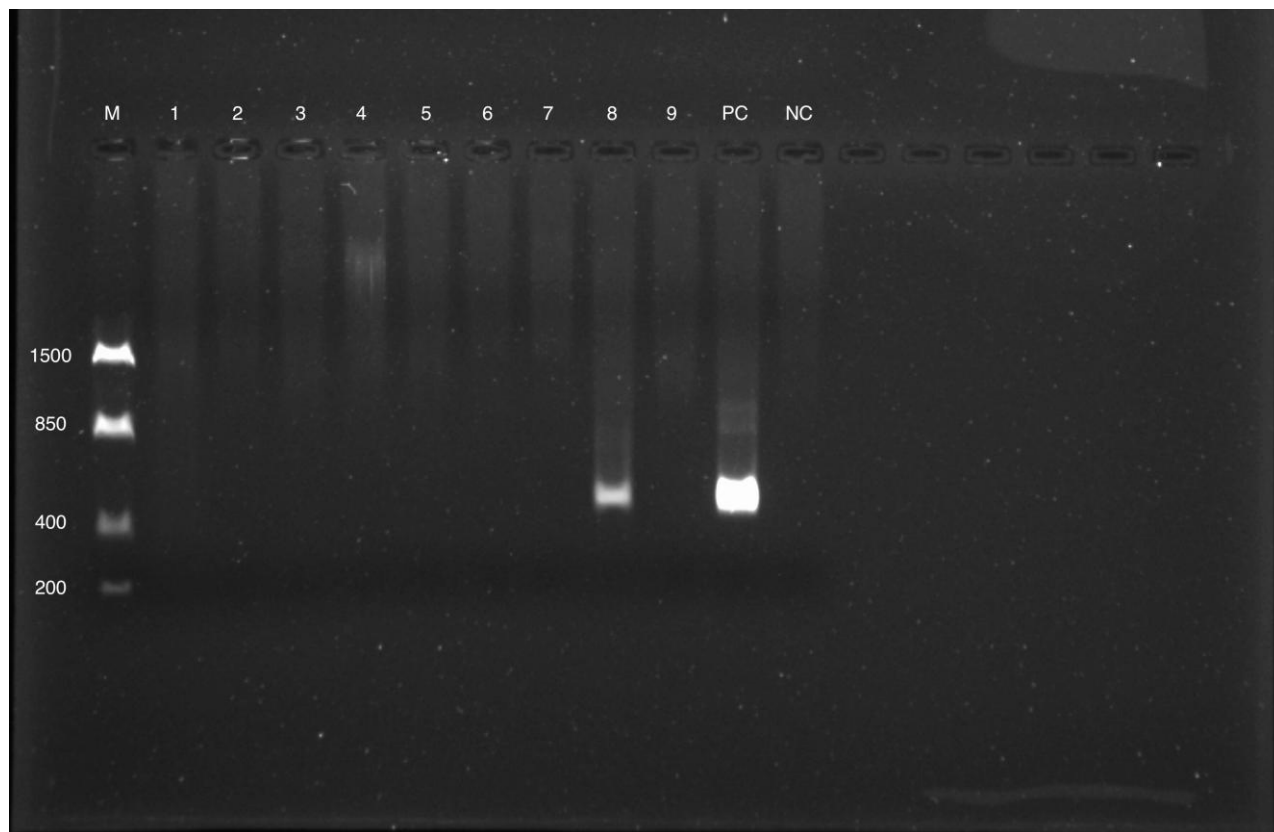

**Figure S3.** Agarose gel electrophoresis of PCR-amplified CTX-M genes in surface sediment samples.

Lanes: M – mol. weight marker; 1 – sample 18; 2 – sample 19; 3 – sample 20; 4 – sample 11; 5 – sample 12; 6 – sample 13; 7 – sample 22; 8 – sample 21; 9 – sample 23; PC – CTX-M positive control (495 b.p.); NC – negative control.
