# Supplementary material for: The Scope of Antibiotic Resistance Genes in Sewages of Rostov-on-Don and lower Don River
Source: Preprints.org preprint supplement (doi:10.20944/preprints201811.0451.v1), 2018-11-19
Supplement: Supplementary file 11 [file supplementary]

Archive with 11 entries (10 files):
- Supplementary materials/
- Supplementary materials/MS 1.pdf
- Supplementary materials/MS 10.pdf
- Supplementary materials/MS 2.pdf
- Supplementary materials/MS 3.pdf
- Supplementary materials/MS 4.pdf
- Supplementary materials/MS 5.pdf
- Supplementary materials/MS 6.pdf
- Supplementary materials/MS 7.pdf
- Supplementary materials/MS 8.pdf
- Supplementary materials/MS 9.pdf
